# Supplementary material
Source: PubMed Central journal article supplement (PMC11042791)
Supplement: NIHMS1980621-supplement-Supplementary_Data.pdf [file NIHMS1980621-supplement-Supplementary_Data.pdf]

Supportive Information Figure 1

**A**

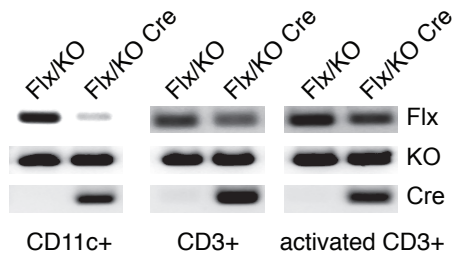

**B**

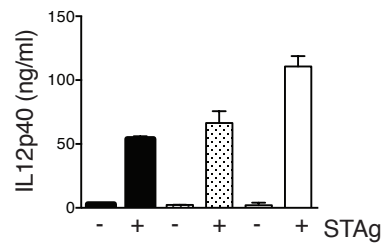

**C**

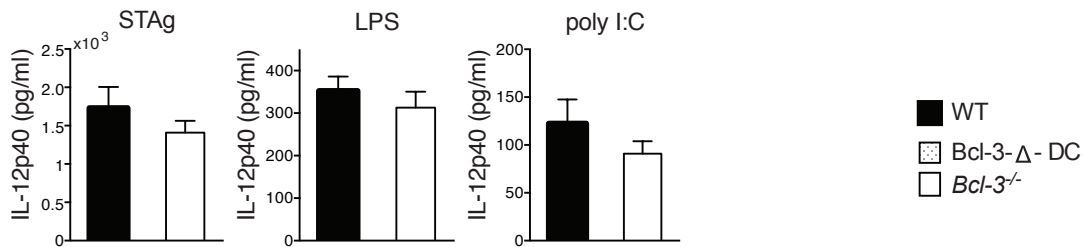

**D**

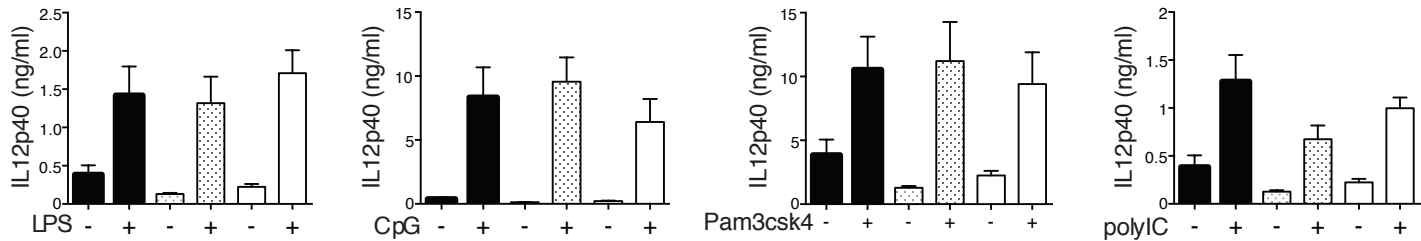

**E**

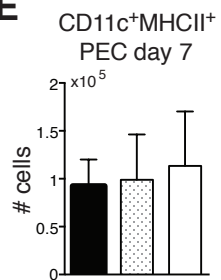

**F**

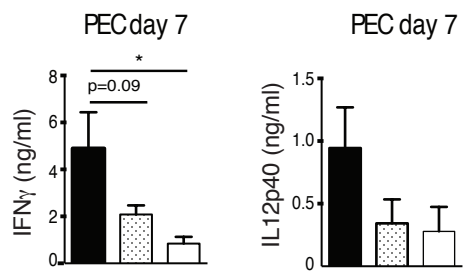

**G**

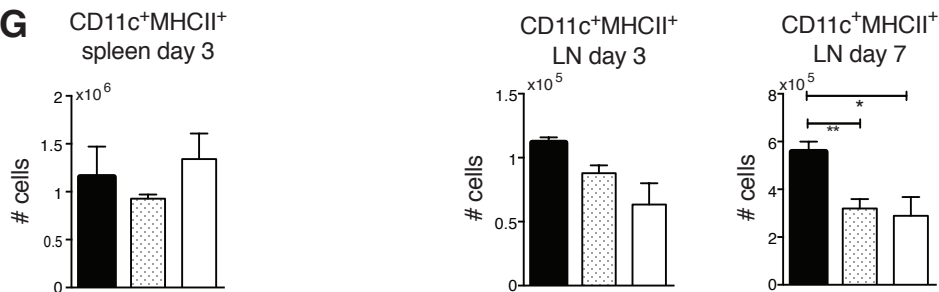

**Supporting Information Figure 1:** (A) Genomic PCRs to detect the floxed (Flx) and Cre-deleted (KO) *Bcl-3* alleles, as well as the *CD11c-Cre* transgene (Cre) in CD11c<sup>+</sup> cells (DCs) and in CD3<sup>+</sup> (T) cells that were not treated or were activated with  $\alpha$ CD3 and  $\alpha$ CD28 (2 $\mu$ g/ml 145-2C11 and 4 $\mu$ g/ml BE0015-1, respectively; BioXCell) for 24h. Cells were isolated from spleens of [*Bcl-3*<sup>flx/-</sup>; *CD11c-Cre*] and [*Bcl-3*<sup>flx/-</sup>] mice with MACS micro beads (Miltenyi Biotec). The remaining low level of the Flx allele in CD11c<sup>+</sup> cells likely reflects minor cellular contamination, as this allele is nearly absent in more highly purified CD11c<sup>+</sup> DCs cells [13]. (B) WT, *Bcl-3*<sup>-/-</sup> and *Bcl-3*- $\Delta$ -DC mice were injected with STAg (10 $\mu$ g/ml) i.v (or not injected) and IL12-p40 was measured in serum 6h later. Mean  $\pm$  SEM; n=3 mice/group. (C) CD11c<sup>+</sup> splenic DCs were isolated from WT and *Bcl-3*<sup>-/-</sup> and 10<sup>5</sup> cells were stimulated with STAg (5 $\mu$ g/ml), LPS (100ng/ml) and polyI:C (100 $\mu$ g/ml) o.n. Levels of IL-12-p40 in supernatant were assessed with ELISA. Mean  $\pm$  SEM; n=3 mice/group. (D) WT, *Bcl-3*<sup>-/-</sup> and *Bcl-3*- $\Delta$ -DC mice were infected with 20 cysts of *T. gondii* (ME49 strain). Cells from peritoneal cavity (PEC) were isolated one week later and 3x10<sup>5</sup> cells were plated o.n in the presence of LPS (100ng/ml), CpG (1 $\mu$ g/ml), Pam3CSK (1 $\mu$ g/ml) and poly I:C (100 $\mu$ g/ml). Levels of IL-12-p40 in supernatant were assessed with ELISA. Mean  $\pm$  SEM; n=3-4 mice/group. (E) WT, *Bcl-3*<sup>-/-</sup> and *Bcl-3*- $\Delta$ -DC mice were infected as above and cells from PECs were isolated one week later and stained for CD11c and MHC-II. Absolute numbers of these cells (inflammatory monocytes derived) shown as mean  $\pm$ SEM; n=4 mice/group. (F) WT, *Bcl-3*<sup>-/-</sup> and *Bcl-3*- $\Delta$ -DC mice were infected as above and levels of IFN $\gamma$  and IL-12p40 in the PEC were measured by CBA and ELISA, respectively. Mean  $\pm$ SEM; n=4 mice/group. (G) WT, *Bcl-3*<sup>-/-</sup> and *Bcl-3*- $\Delta$ -DC mice were infected as above. Cells from spleen and mesenteric lymph nodes (LN) were isolated 3 and/or 7 days later and stained for CD11c and MHC-II. Absolute numbers of DCs shown as mean  $\pm$ SEM; n=4 mice/group.

\*p<0.05 and \*\*p<0.01
